# Supplementary material for: Hyperthermia Treatment Planning Including Convective Flow in Cerebrospinal Fluid for Brain Tumour Hyperthermia Treatment Using a Novel Dedicated Paediatric Brain Applicator
Source: Cancers (Basel). 2019 Aug 15;11(8):1183. doi: 10.3390/cancers11081183 (PMC6721488; doi:10.3390/cancers11081183)
Supplement: Supplementary file 1 [file cancers-11-01183-s001.pdf]

# Hyperthermia treatment planning including convective flow in cerebrospinal fluid for brain tumour hyperthermia treatment using a novel dedicated paediatric brain applicator

G. Schooneveldt<sup>1,\*</sup>, H. Dobšiček Trefná<sup>2</sup>, M. Persson<sup>2</sup>, T.M. de Reijke<sup>3</sup>, K. Blomgren<sup>4</sup>, H.P. Kok<sup>1</sup> and J. Crezee<sup>1</sup>

<sup>1</sup> Dept of Radiotherapy, Amsterdam UMC, University of Amsterdam, the Netherlands

<sup>2</sup> Dept of Electrical Engineering, Chalmers University of Technology, Gothenburg, Sweden

<sup>3</sup> Dept of Urology, Amsterdam UMC, University of Amsterdam, the Netherlands

<sup>4</sup> Dept of Women's and Children's Health, Karolinska Institute, Stockholm, Sweden

\* Correspondence: g.schooneveldt@amsterdamumc.nl

Received: 29 June 2019; Accepted: 13 August 2019; Published: 15 August 2019

## 1. Supplemental Material

**Table S1.** Thermal parameters for the analysis of a single treatment plan (ergo the same SAR-distribution), according to three different models results for the pre-operative case. Treatment target evaluation parameters  $T_{90}$ ,  $T_{50}$ , and  $T_{10}$  are given, *i.e.* the temperature exceeded by, respectively, 90, 50, and 10 % of the volume (temperatures in the range 42–43 °C are generally considered clinically optimal temperatures). For the healthy tissue, the volume exceeding, respectively, 41, 42, and 43 °C is given (lower volumes are clinically preferred). Total volume: white matter = 124.669 ml; grey matter = 1006.547 ml; CSF = 339.982 ml; tumour = 92.031 ml.

| pre-operative case         |               |               |               |               |               |               |                  |               |               |
|----------------------------|---------------|---------------|---------------|---------------|---------------|---------------|------------------|---------------|---------------|
| organ                      | fluid         |               |               | solid         |               |               | $k_{eff}/k = 10$ |               |               |
| target                     | $T_{90}$ [°C] | $T_{50}$ [°C] | $T_{10}$ [°C] | $T_{90}$ [°C] | $T_{50}$ [°C] | $T_{10}$ [°C] | $T_{90}$ [°C]    | $T_{50}$ [°C] | $T_{10}$ [°C] |
| tumour <sup>1</sup>        | 39.2          | 41.1          | 45.8          | 39.1          | 41.1          | 46.8          | 39.1             | 41.0          | 46.5          |
| tumour margin <sup>2</sup> | 37.6          | 39.1          | 43.0          | 37.5          | 39.1          | 43.8          | 37.6             | 39.1          | 43.0          |
| CSF <sup>3</sup>           | 39.6          | 43.6          | 44.7          | 39.9          | 42.9          | 48.8          | 39.8             | 41.9          | 46.3          |
| Healthy tissue             | $V_{41}$ [ml] | $V_{42}$ [ml] | $V_{43}$ [ml] | $V_{41}$ [ml] | $V_{42}$ [ml] | $V_{43}$ [ml] | $V_{41}$ [ml]    | $V_{42}$ [ml] | $V_{43}$ [ml] |
| white matter               | 0.066         | 0.041         | 0.030         | 0.240         | 0.041         | 0.038         | 0.070            | 0.042         | 0.041         |
| grey matter                | 16.179        | 6.504         | 2.741         | 22.497        | 9.394         | 4.209         | 19.806           | 7.764         | 3.017         |
| CSF <sup>4</sup>           | 12.841        | 4.840         | 1.816         | 40.757        | 22.060        | 10.847        | 10.504           | 4.722         | 1.220         |

<sup>1</sup>Including cysts; <sup>2</sup>i.e. a 1 cm solid tissue margin around the tumour; <sup>3</sup>CSF in the tumour margin; <sup>4</sup>CSF outside the target volume only.

**Table S2.** Thermal parameters for the analysis of a single treatment plan (ergo the same SAR-distribution), according to three different models results for the post-operative case. Treatment target evaluation parameters  $T_{90}$ ,  $T_{50}$ , and  $T_{10}$  are given, *i.e.* the temperature exceeded by, respectively, 90, 50, and 10 % of the volume (temperatures in the range 42–43 °C are generally considered clinically optimal temperatures). For the healthy tissue, the volume exceeding, respectively, 41, 42, and 43 °C is given (lower volumes are clinically preferred). Total volume: white matter = 124.669 ml; grey matter = 1006.547 ml; CSF = 447.709 ml.

| post-operative case        |               |               |               |               |               |               |                  |               |               |
|----------------------------|---------------|---------------|---------------|---------------|---------------|---------------|------------------|---------------|---------------|
| organ                      | fluid         |               |               | solid         |               |               | $k_{eff}/k = 10$ |               |               |
| target                     | $T_{90}$ [°C] | $T_{50}$ [°C] | $T_{10}$ [°C] | $T_{90}$ [°C] | $T_{50}$ [°C] | $T_{10}$ [°C] | $T_{90}$ [°C]    | $T_{50}$ [°C] | $T_{10}$ [°C] |
| tumour region (CSF)        | 38.9          | 42.5          | 42.9          | 38.0          | 42.0          | 54.5          | 38.4             | 41.5          | 46.0          |
| tumour margin <sup>1</sup> | 36.2          | 38.4          | 40.9          | 37.2          | 38.6          | 44.2          | 37.3             | 38.8          | 42.3          |
| CSF <sup>2</sup>           | 41.7          | 42.5          | 42.9          | 43.2          | 52.2          | 63.9          | 41.9             | 44.2          | 46.6          |
| Healthy tissue             | $V_{41}$ [ml] | $V_{42}$ [ml] | $V_{43}$ [ml] | $V_{41}$ [ml] | $V_{42}$ [ml] | $V_{43}$ [ml] | $V_{41}$ [ml]    | $V_{42}$ [ml] | $V_{43}$ [ml] |
| white matter               | 0.222         | 0.050         | 0.0           | 0.163         | 0.121         | 0.109         | 0.231            | 0.133         | 0.085         |
| grey matter                | 4.995         | 0.496         | 0.0           | 12.642        | 7.665         | 4.702         | 13.342           | 6.799         | 3.107         |
| CSF <sup>3</sup>           | 6.531         | 3.196         | 0.0           | 0.503         | 0.216         | 0.122         | 0.789            | 0.313         | 0.183         |

<sup>1</sup>I.e. a 1 cm solid tissue margin around the tumour; <sup>2</sup>CSF in the tumour margin; <sup>3</sup>CSF outside the target volume only.

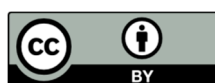

© 2019 by the authors. Licensee MDPI, Basel, Switzerland. This article is an open access article distributed under the terms and conditions of the Creative Commons Attribution (CC BY) license (<http://creativecommons.org/licenses/by/4.0/>).
